# Supplementary material for: Association of Zip Code Vaccination Rate With COVID-19 Mortality in Chicago, Illinois
Source: PubMed Central journal article supplement (PMC9142872; doi:10.1001/jamanetworkopen.2022.14753), 2022-05-27
Supplement: jamanetwopen-e2214753-s001.pdf [file jamanetwopen-e2214753-s001.pdf]

## Supplemental Online Content

Zeng S, Pelzer KM, Gibbons RD, Peek ME, Parker WF. Association of zip code vaccination rate with COVID-19 mortality in Chicago, Illinois. *JAMA Netw Open*. 2022;5(5):e2214753. doi:10.1001/jamanetworkopen.2022.14753

**eFigure.** Visualizations of Alpha Vaccination Groups

**eTable 1.** Zip Codes Excluded From Analysis

**eTable 2.** Demographics of Study Population

**eTable 3.** List of Zip Codes and Groups Included in Analysis

**eTable 4.** Alpha Wave Complete Mixed-Effects Models Output

**eTable 5.** Delta Wave Complete Mixed-Effects Models Output

**eTable 6.** Sensitivity Analyses Using Percentage of Population Fully Vaccinated

**eTable 7.** Sensitivity Analysis Using Vaccination Groups

**eTable 8.** Sensitivity Analysis With 2-Week Lag Period

**eTable 9.** Sensitivity Analysis With 8-Week Lag Period

**eTable 10.** Sensitivity Analysis Using Census Tract-Level Data (Alpha Wave)

**eTable 11.** Sensitivity Analysis Using Census Tract-Level Data (Delta Wave)

**eTable 12.** Test for Parallel Trends

This supplemental material has been provided by the authors to give readers additional information about their work.

**eFigure.** Visualizations of Alpha Vaccination Groups

**(a)** Line graph showing cumulative vaccinations in each ZIP code from December 13, 2020, to November 6, 2021. Color and dot shape represent vaccination groups to which the ZIP codes were assigned. Vertical lines denote the first date of vaccination phases in Chicago (Phase 1A: residential healthcare facilities and healthcare workers; 4 weeks after Phase 1A: Estimated date that the earliest vaccine effect would be detectable; Phase 1B: aged 65+, non-healthcare residential settings, and frontline essential workers; Phase 1C: aged 16-64 with underlying medical conditions and all other essential workers; Phase 2: remaining Chicagoans aged 16+).

**(b)** Histogram of vaccination levels. **(c)** Map of ZIP codes.

**(a)**

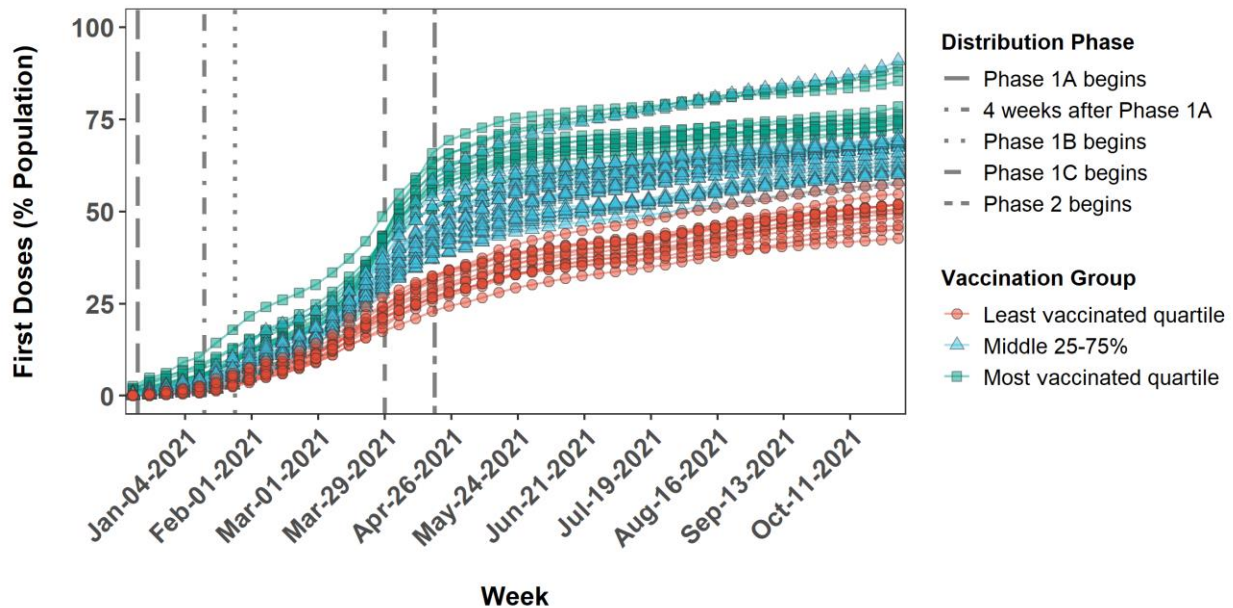

(b)

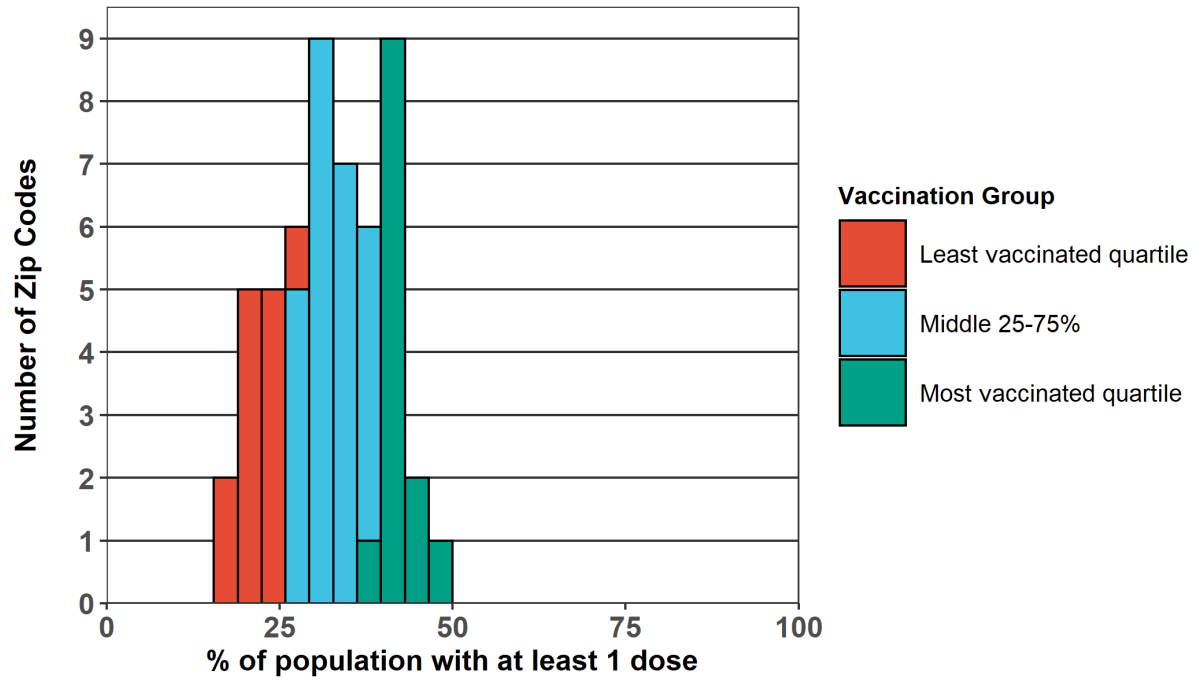

(c)

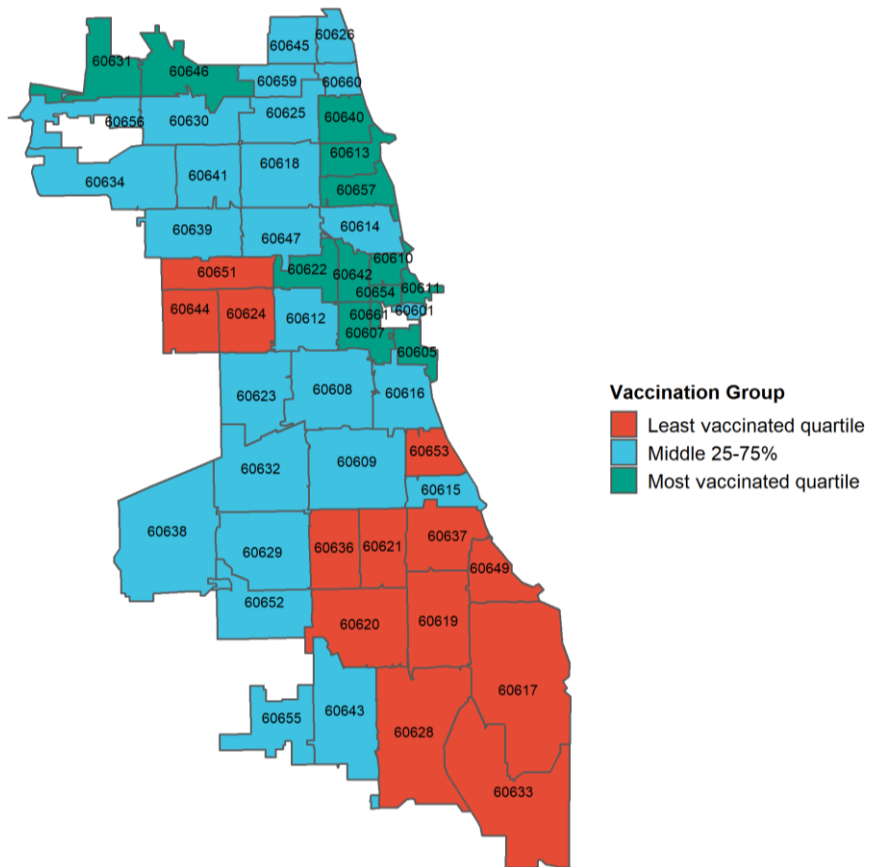

**eTable 1. Zip Codes Excluded From Analysis**

List of ZIP codes excluded from analyses. Five ZIP codes (60602, 60603, 60604, 60606, 60666) were excluded because they contained fewer than 10,000 residents. 60707 and 60827 were excluded because they lie mostly outside the City of Chicago limits.

| <b>ZIP</b>   | <b>Vaccination Group</b> | <b>Number of First Doses by 3/28/21</b> | <b>% First Doses by 3/28/21</b> | <b>Number of First Doses by 8/1/21</b> | <b>% First Doses by 8/1/21</b> | <b>Population</b> |
|--------------|--------------------------|-----------------------------------------|---------------------------------|----------------------------------------|--------------------------------|-------------------|
| <b>60602</b> | Outliers                 | 683                                     | 59.7                            | 1281                                   | 112                            | 1145              |
| <b>60603</b> | Outliers                 | 682                                     | 64.8                            | 1465                                   | 139                            | 1052              |
| <b>60604</b> | Outliers                 | 389                                     | 47.3                            | 772                                    | 93.8                           | 823               |
| <b>60606</b> | Outliers                 | 1570                                    | 47.8                            | 3165                                   | 96.3                           | 3287              |
| <b>60666</b> | Outliers                 | 55                                      | 0                               | 92                                     | 0                              | 0                 |
| <b>60707</b> | Outliers                 | 4830                                    |                                 |                                        |                                |                   |
| <b>60827</b> | Outliers                 | 451                                     |                                 |                                        |                                |                   |

**eTable 2.** Demographics of Study Population

|                                                           |                            |
|-----------------------------------------------------------|----------------------------|
| <b>Population</b>                                         | 2686355                    |
| <b>Age</b>                                                | <b>No. (%)<sup>a</sup></b> |
| Age 0-17                                                  | 561320 (21)                |
| Age 18-65                                                 | 1790772 (67)               |
| Age 65+                                                   | 334263 (12)                |
| <b>Median Age Years (IQR)</b>                             | 34 (32-38)                 |
| <b>Sex</b>                                                | <b>No. (%)</b>             |
| Female                                                    | 1378658 (51)               |
| Male                                                      | 1307697 (49)               |
| <b>Race and Ethnicity</b>                                 | <b>No. (%)</b>             |
| Hispanic or Latino                                        | 773938 (29)                |
| Non-Hispanic or Latino                                    |                            |
| Asian                                                     | 175220 (7)                 |
| Black                                                     | 783916 (29)                |
| White                                                     | 894555 (33)                |
| Other                                                     | 58726 (2)                  |
| <b>High School Graduate or Higher No. (%)<sup>b</sup></b> | 1582411 (84)               |
| <b>With Health Insurance No. (%)<sup>c</sup></b>          | 2402389 (90)               |
| <b>Median Household Income \$ (IQR)</b>                   | 52044 (41158-92595)        |

<sup>a</sup> No. (%) = total number (percentage of total population).

<sup>b</sup> Calculated as percentage of population over 25 years old (1,859,429).

<sup>c</sup> Calculated as percentage of civilian noninstitutionalized population (2,659,714).

**eTable 3.** List of Zip Codes and Groups Included in Analysis

| <b>ZIP</b> | <b>Vaccination Group</b>  | <b>Number of First Doses by 3/28/21</b> | <b>% First Doses by 3/28/21</b> | <b>Number of First Doses by 8/1/21</b> | <b>% First Doses by 8/1/21</b> | <b>Population</b> |
|------------|---------------------------|-----------------------------------------|---------------------------------|----------------------------------------|--------------------------------|-------------------|
| 60621      | Least vaccinated quartile | 4913                                    | 17.5                            | 10202                                  | 36.4                           | 28018             |
| 60633      | Least vaccinated quartile | 2348                                    | 18.5                            | 4789                                   | 37.7                           | 12689             |
| 60624      | Least vaccinated quartile | 6791                                    | 19.5                            | 14168                                  | 40.6                           | 34892             |
| 60636      | Least vaccinated quartile | 6156                                    | 20.5                            | 13279                                  | 44.2                           | 30024             |
| 60649      | Least vaccinated quartile | 9845                                    | 21.1                            | 18082                                  | 38.8                           | 46633             |
| 60644      | Least vaccinated quartile | 9881                                    | 21.2                            | 18694                                  | 40.1                           | 46591             |
| 60620      | Least vaccinated quartile | 15043                                   | 22.2                            | 27911                                  | 41.2                           | 67711             |
| 60637      | Least vaccinated quartile | 10682                                   | 22.6                            | 20881                                  | 44.1                           | 47300             |
| 60628      | Least vaccinated quartile | 14684                                   | 22.9                            | 27199                                  | 42.3                           | 64254             |
| 60617      | Least vaccinated quartile | 19283                                   | 23.1                            | 37536                                  | 44.9                           | 83553             |
| 60651      | Least vaccinated quartile | 15366                                   | 24.2                            | 31428                                  | 49.5                           | 63492             |
| 60619      | Least vaccinated quartile | 14962                                   | 24.4                            | 26729                                  | 43.7                           | 61207             |
| 60653      | Least vaccinated quartile | 8846                                    | 26.7                            | 14680                                  | 44.3                           | 33154             |
| 60659      | Middle 25-75%             | 11879                                   | 27.8                            | 25582                                  | 59.9                           | 42735             |
| 60612      | Middle 25-75%             | 9636                                    | 28.6                            | 17032                                  | 50.5                           | 33735             |
| 60609      | Middle 25-75%             | 17628                                   | 28.9                            | 32543                                  | 53.4                           | 60939             |
| 60656      | Middle 25-75%             | 8219                                    | 29.1                            | 15244                                  | 54                             | 28218             |
| 60623      | Middle 25-75%             | 23703                                   | 29.2                            | 44275                                  | 54.5                           | 81283             |
| 60638      | Middle 25-75%             | 17467                                   | 29.8                            | 31360                                  | 53.5                           | 58669             |
| 60652      | Middle 25-75%             | 13147                                   | 30.3                            | 24083                                  | 55.4                           | 43447             |
| 60639      | Middle 25-75%             | 26810                                   | 30.4                            | 53431                                  | 60.6                           | 88204             |
| 60629      | Middle 25-75%             | 33615                                   | 30.6                            | 65216                                  | 59.3                           | 110029            |
| 60634      | Middle 25-75%             | 23311                                   | 31                              | 43882                                  | 58.4                           | 75082             |
| 60641      | Middle 25-75%             | 21998                                   | 31.5                            | 43708                                  | 62.5                           | 69880             |
| 60645      | Middle 25-75%             | 14982                                   | 31.7                            | 29784                                  | 63                             | 47270             |

|              |                          |       |      |       |      |       |
|--------------|--------------------------|-------|------|-------|------|-------|
| <b>60626</b> | Middle 25-75%            | 16552 | 32.7 | 31519 | 62.4 | 50544 |
| <b>60632</b> | Middle 25-75%            | 29379 | 32.7 | 54483 | 60.6 | 89857 |
| <b>60616</b> | Middle 25-75%            | 18074 | 33.3 | 34301 | 63.3 | 54197 |
| <b>60630</b> | Middle 25-75%            | 18824 | 33.4 | 34332 | 60.8 | 56433 |
| <b>60643</b> | Middle 25-75%            | 16370 | 33.5 | 26497 | 54.2 | 48887 |
| <b>60615</b> | Middle 25-75%            | 13978 | 34.4 | 24558 | 60.5 | 40590 |
| <b>60625</b> | Middle 25-75%            | 27379 | 34.5 | 51326 | 64.6 | 79444 |
| <b>60618</b> | Middle 25-75%            | 33329 | 35.1 | 59896 | 63.1 | 94907 |
| <b>60655</b> | Middle 25-75%            | 10130 | 35.5 | 15553 | 54.4 | 28569 |
| <b>60608</b> | Middle 25-75%            | 29498 | 36.8 | 46767 | 58.4 | 80059 |
| <b>60647</b> | Middle 25-75%            | 32408 | 37   | 57271 | 65.4 | 87633 |
| <b>60660</b> | Middle 25-75%            | 16444 | 37   | 28895 | 64.9 | 44498 |
| <b>60601</b> | Middle 25-75%            | 5765  | 38.2 | 11937 | 79.1 | 15083 |
| <b>60614</b> | Middle 25-75%            | 28064 | 39   | 46283 | 64.3 | 71954 |
| <b>60610</b> | Most vaccinated quartile | 16074 | 39.6 | 27005 | 66.6 | 40548 |
| <b>60646</b> | Most vaccinated quartile | 11482 | 40.2 | 18259 | 63.9 | 28569 |
| <b>60622</b> | Most vaccinated quartile | 21756 | 40.8 | 36258 | 68   | 53294 |
| <b>60640</b> | Most vaccinated quartile | 28646 | 41.3 | 47968 | 69.2 | 69363 |
| <b>60642</b> | Most vaccinated quartile | 8140  | 41.3 | 13835 | 70.2 | 19716 |
| <b>60631</b> | Most vaccinated quartile | 12378 | 41.9 | 18709 | 63.4 | 29529 |
| <b>60607</b> | Most vaccinated quartile | 12377 | 42.3 | 20350 | 69.5 | 29293 |
| <b>60661</b> | Most vaccinated quartile | 4413  | 42.6 | 8253  | 79.7 | 10354 |
| <b>60605</b> | Most vaccinated quartile | 12467 | 42.9 | 20925 | 72   | 29060 |
| <b>60657</b> | Most vaccinated quartile | 30412 | 42.9 | 50052 | 70.5 | 70958 |
| <b>60654</b> | Most vaccinated quartile | 8678  | 43.3 | 15959 | 79.7 | 20022 |
| <b>60613</b> | Most vaccinated quartile | 22026 | 43.4 | 36686 | 72.3 | 50761 |
| <b>60611</b> | Most vaccinated quartile | 16135 | 48.6 | 26188 | 78.8 | 33224 |



**eTable 4.** Alpha Wave Complete Mixed-Effects Models Output

To analyze the correlation between vaccination levels on March 28, 2021, and alpha wave-specific COVID-19 mortality, we narrowed our dataset to start at December 13, 2020, the peak of deaths during the second wave of COVID-19 mortality, and analyzed data from this date to the end of the alpha wave on June 20, 2021. We fit the data to the following models:

$$(1) \quad \ln(Y_i) - \ln(\text{Population}) = \beta_{0i} + \beta_1(\text{Week}) + \beta_2(\text{Wave}) + \beta_3(\text{Wave} \times \text{Vaccination Coverage})$$

$$(2) \quad \ln(Y_i) - \ln(\text{Population}) = \beta_{0i} + \beta_1(\text{Week}) + \beta_2(\text{Wave}) + \beta_3(\text{Wave} \times \text{Vaccination Coverage}) + \beta_4(\text{Recovered}) + \beta_5(65+)$$

Where  $\beta_{0i} = \beta_0 + v_{0i}$  and is a randomly distributed intercept with random effects structure

$$v_{0i} \sim N(0, \sigma_v^2)$$

**Week** is a continuous variable describing the number of weeks since the start of the data, **Wave** is a categorical variable describing whether at date was in the second or alpha wave, **Recovered** is a continuous variable describing the percentage of ZIP code residents who had recovered from COVID-19 by March 28, 2021, and **65 +** is a continuous variable describing the percentage of ZIP code residents who are at least 65 years old.

**Wave** is a categorical indicator variable for date after March 28<sup>th</sup>, 2021.

**Wave**  $\times$  **Vaccination Coverage** describes the effect of a 10-percentage point increase in vaccinations by March 28, 2021, on the number of deaths per week in the alpha wave.

**eTable 4: Alpha wave complete mixed-effects models output (continued)**

| Predictors                                           | Unadjusted          |            |        | Adjusted            |            |        |
|------------------------------------------------------|---------------------|------------|--------|---------------------|------------|--------|
|                                                      | Estimate            | Std. Error | p      | Estimate            | Std. Error | p      |
| (Intercept)                                          | -9.87               | 0.08       | <0.001 | -11.56              | 0.28       | <0.001 |
| Week                                                 | -0.11               | 0.01       | <0.001 | -0.11               | 0.01       | <0.001 |
| Wave                                                 | 2.41                | 0.28       | <0.001 | 2.39                | 0.27       | <0.001 |
| Wave×Vaccination Coverage                            | -0.50               | 0.09       | <0.001 | -0.49               | 0.08       | <0.001 |
| Recovered                                            |                     |            |        | 0.84                | 0.19       | <0.001 |
| 65+                                                  |                     |            |        | 0.74                | 0.13       | <0.001 |
| <b>Random Effects</b>                                |                     |            |        |                     |            |        |
| $\sigma^2$                                           | 0.74                |            |        | 0.74                |            |        |
| T <sub>00</sub>                                      | 0.18 <sub>zip</sub> |            |        | 0.07 <sub>zip</sub> |            |        |
| ICC                                                  | 0.19                |            |        | 0.08                |            |        |
| N                                                    | 52 <sub>zip</sub>   |            |        | 52 <sub>zip</sub>   |            |        |
| Observations                                         | 1404                |            |        | 1404                |            |        |
| Marginal R <sup>2</sup> / Conditional R <sup>2</sup> | 0.292 / 0.430       |            |        | 0.394 / 0.445       |            |        |

**eTable 5.** Delta Wave Complete Mixed-Effects Models Output

The same model structure described in equations 1 and 2 (see above in **eTable 4**) was also used to estimate the association between vaccination levels on August 1, 2021, and delta wave-specific COVID-19 mortality. We analyzed data from the peak of the alpha wave of deaths on May 9, 2021, to the end of the delta wave on November 6, 2021.

**Week** is a continuous variable describing the number of weeks since the start of the data,

**Wave** is a categorical variable describing whether if the date was after August 1, 2021

**Recovered** is a continuous variable describing the percentage of ZIP code residents who had recovered from COVID-19 by August 1, 2021, and **65 +** is a continuous variable describing the percentage of ZIP code residents who are at least 65 years old.

**Wave × Vaccination Coverage** describes the effect of a 10-percentage point increase in vaccinations by August 1, 2021, on the number of deaths per week in the delta wave.

| Predictors                                           | Unadjusted          |            |        |  | Adjusted            |            |        |
|------------------------------------------------------|---------------------|------------|--------|--|---------------------|------------|--------|
|                                                      | Estimate            | Std. Error | p      |  | Estimate            | Std. Error | p      |
| (Intercept)                                          | -11.42              | 0.10       | <0.001 |  | -12.87              | 0.39       | <0.001 |
| Week                                                 | -0.07               | 0.01       | <0.001 |  | -0.07               | 0.01       | <0.001 |
| Wave                                                 | 2.62                | 0.43       | <0.001 |  | 2.62                | 0.42       | <0.001 |
| Wave×Vaccination Coverage                            | -0.28               | 0.09       | <0.001 |  | -0.28               | 0.07       | <0.001 |
| Recovered                                            |                     |            |        |  | 0.51                | 0.51       | 0.039  |
| 65+                                                  |                     |            |        |  | 0.73                | 0.17       | <0.001 |
| <b>Random Effects</b>                                |                     |            |        |  |                     |            |        |
| $\sigma^2$                                           | 1.31                |            |        |  | 1.31                |            |        |
| T <sub>00</sub>                                      | 0.17 <sub>zip</sub> |            |        |  | 0.09 <sub>zip</sub> |            |        |
| ICC                                                  | 0.12                |            |        |  | 0.06                |            |        |
| N                                                    | 52 <sub>zip</sub>   |            |        |  | 52 <sub>zip</sub>   |            |        |
| Observations                                         | 1352                |            |        |  | 1352                |            |        |
| Marginal R <sup>2</sup> / Conditional R <sup>2</sup> | 0.073 / 0.182       |            |        |  | 0.154 / 0.208       |            |        |

**eTable 6.** Sensitivity Analyses Using Percentage of Population Fully Vaccinated

We ran Model 2 using the percentage of residents fully vaccinated by March 28, 2021 (alpha wave) or August 1, 2021 (delta wave), rather than the percentage of residents with at least one dose. A 1 unit increase of *Wave* × *Fully Vaccinated Coverage* corresponds to a 10-percentage point increase in fully vaccinated residents.

| Predictors                                              | Alpha           |                        |        | Delta           |                         |        |
|---------------------------------------------------------|-----------------|------------------------|--------|-----------------|-------------------------|--------|
|                                                         | Estimate        | IRR (CI)               | p      | Estimate        | IRR (CI)                | p      |
| (Intercept)                                             | -11.64          | 0.00<br>(0.00 – 0.00)  | <0.001 | -12.86          | 0.00<br>(0.00 – 0.00)   | <0.001 |
| Week                                                    | -0.11           | 0.90<br>(0.88 – 0.91)  | <0.001 | -0.07           | 0.94<br>(0.92 – 0.96)   | <0.001 |
| Wave                                                    | 2.26            | 9.55<br>(5.81 – 15.70) | <0.001 | 2.47            | 11.77<br>(5.50 – 25.17) | <0.001 |
| Recovered                                               | 0.85            | 2.34<br>(1.61 – 3.42)  | <0.001 | 0.50            | 1.64<br>(1.02 – 2.66)   | 0.043  |
| 65+                                                     | 0.80            | 2.22<br>(1.73 – 2.85)  | <0.001 | 0.74            | 2.09<br>(1.50 – 2.91)   | <0.001 |
| Wave×Fully Vaccinated Coverage                          | -0.80           | 0.45<br>(0.34 – 0.59)  | <0.001 | -0.27           | 0.76<br>(0.66 – 0.87)   | <0.001 |
| <b>Random Effects</b>                                   |                 |                        |        |                 |                         |        |
| $\sigma^2$                                              | 0.74            |                        |        | 1.31            |                         |        |
| T00 zip                                                 | 0.07 zip        |                        |        | 0.09 zip        |                         |        |
| ICC                                                     | 0.09            |                        |        | 0.06            |                         |        |
| N zip                                                   | 52 zip          |                        |        | 52 zip          |                         |        |
| Observations                                            | 1404            |                        |        | 1352            |                         |        |
| Marginal R <sup>2</sup> /<br>Conditional R <sup>2</sup> | 0.386/<br>0.437 |                        |        | 0.153/<br>0.206 |                         |        |

**eTable 7.** Sensitivity Analysis Using Vaccination Groups

As another sensitivity analysis, we ran Model 2 using the categorical variable *Week* × *Vaccination\_Group* rather than continuous variable *Wave* × *Vaccinations*. The reference group was [*Most vaccinated quartile*].

For the delta wave analysis, we re-assigned ZIP codes to quartiles based on first-dose vaccination levels at beginning of the delta wave of deaths on August 1, 2021. All of the ZIP codes which were in the least vaccinated quartile before the alpha wave remained in this quartile before the delta wave. Two of the ZIP codes in the most vaccinated quartile from the alpha wave were swapped with ZIP codes from the middle 25-75%.

| Predictors                                              | Alpha           |                       |        | Delta           |                       |        |
|---------------------------------------------------------|-----------------|-----------------------|--------|-----------------|-----------------------|--------|
|                                                         | Estimate        | IRR (CI)              | p      | Estimate        | IRR (CI)              | p      |
| (Intercept)                                             | -11.66          | 0.00<br>(0.00 – 0.00) | <0.001 | -12.85          | 0.00<br>(0.00 – 0.00) | <0.001 |
| Week                                                    | -0.11           | 0.90<br>(0.88 – 0.91) | <0.001 | -0.07           | 0.94<br>(0.92 – 0.96) | <0.001 |
| Wave                                                    | 0.42            | 1.53<br>(1.03 – 2.27) | 0.034  | 0.53            | 1.69<br>(1.00 – 2.86) | 0.048  |
| Recovered                                               | 0.92            | 2.51<br>(1.69 – 3.73) | <0.001 | 0.47            | 1.60<br>(0.93 – 2.76) | 0.089  |
| 65+                                                     | 0.76            | 2.14<br>(1.65 – 2.77) | <0.001 | 0.74            | 2.09<br>(1.46 – 3.00) | <0.001 |
| Wave×Vaccination_Group<br>[Least vaccinated quartile]   | 0.92            | 2.53<br>(1.71 – 3.75) | <0.001 | 0.81            | 2.25<br>(1.35 – 3.75) | 0.001  |
| Wave×Vaccination_Group<br>[Middle 25-75%]               | 0.33            | 1.42<br>(0.97 – 2.07) | 0.089  | 0.54            | 1.71<br>(1.07 – 2.74) | 0.026  |
|                                                         |                 |                       |        |                 |                       |        |
| <b>Random Effects</b>                                   |                 |                       |        |                 |                       |        |
| σ <sup>2</sup>                                          | 0.75            |                       |        | 1.31            |                       |        |
| T00 zip                                                 | 0.08 zip        |                       |        | 0.12 zip        |                       |        |
| ICC                                                     | 0.09            |                       |        | 0.08            |                       |        |
| N zip                                                   | 52 zip          |                       |        | 52 zip          |                       |        |
| Observations                                            | 1404            |                       |        | 1352            |                       |        |
| Marginal R <sup>2</sup> /<br>Conditional R <sup>2</sup> | 0.381/<br>0.437 |                       |        | 0.149/<br>0.220 |                       |        |
|                                                         |                 |                       |        |                 |                       |        |

**eTable 8.** Sensitivity Analysis With 2-Week Lag Period

In addition to the Poisson regression model using a 6-week lag period as outlined in the main text, we ran Model 2 (see page 10) using the percentage of residents fully vaccinated by 2 weeks before the peaks of the alpha and delta waves (April 25, 2021, and August 29, 2021, respectively).

| Predictors                                              | Alpha           |                         |        | Delta           |                         |        |
|---------------------------------------------------------|-----------------|-------------------------|--------|-----------------|-------------------------|--------|
|                                                         | Estimate        | IRR (CI)                | p      | Estimate        | IRR (CI)                | p      |
| (Intercept)                                             | -11.57          | 0.00<br>(0.00 – 0.00)   | <0.001 | -12.90          | 0.00<br>(0.00 – 0.00)   | <0.001 |
| Week                                                    | -0.11           | 0.90<br>(0.88 – 0.91)   | <0.001 | -0.07           | 0.94<br>(0.92 – 0.96)   | <0.001 |
| Wave                                                    | 2.32            | 10.17<br>(6.11 – 16.94) | <0.001 | 2.74            | 15.54<br>(6.45 – 37.40) | <0.001 |
| Recovered 2 Weeks                                       | 0.83            | 2.30<br>(1.58 – 3.35)   | <0.001 | 0.51            | 1.67<br>(1.03 – 2.72)   | 0.04   |
| 65+                                                     | 0.72            | 2.05<br>(1.60 – 2.64)   | <0.001 | 0.74            | 2.09<br>(1.49 – 2.92)   | <0.001 |
| Wave×Vaccination Coverage 2 Weeks                       | -0.33           | 0.72<br>(0.64 – 0.80)   | <0.001 | -0.29           | 0.75<br>(0.65 – 0.87)   | <0.001 |
| <b>Random Effects</b>                                   |                 |                         |        |                 |                         |        |
| $\sigma^2$                                              | 0.74            |                         |        | 1.31            |                         |        |
| T00 zip                                                 | 0.07 zip        |                         |        | 0.09 zip        |                         |        |
| ICC                                                     | 0.09            |                         |        | 0.07            |                         |        |
| N zip                                                   | 52 zip          |                         |        | 52 zip          |                         |        |
| Observations                                            | 1404            |                         |        | 1352            |                         |        |
| Marginal R <sup>2</sup> /<br>Conditional R <sup>2</sup> | 0.401/<br>0.452 |                         |        | 0.154/<br>0.209 |                         |        |

**eTable 9.** Sensitivity Analysis With 8-Week Lag Period

In addition to the Poisson regression model using a 6-week lag period as outlined in the main text, we ran Model 2 using the percentage of residents fully vaccinated by 8 weeks before the peaks of the alpha and delta waves (March 14, 2021, and July 18, 2021, respectively).

| Predictors                                              | Alpha               |                         |        | Delta               |                         |        |
|---------------------------------------------------------|---------------------|-------------------------|--------|---------------------|-------------------------|--------|
|                                                         | Estimate            | IRR (CI)                | p      | Estimate            | IRR (CI)                | p      |
| (Intercept)                                             | -11.61              | 0.00<br>(0.00 – 0.00)   | <0.001 | -12.85              | 0.00<br>(0.00 – 0.00)   | <0.001 |
| Week                                                    | -0.11               | 0.90<br>(0.88 – 0.91)   | <0.001 | -0.07               | 0.94<br>(0.92 – 0.96)   | <0.001 |
| Wave                                                    | 2.51                | 12.30<br>(6.98 – 21.69) | <0.001 | 2.57                | 13.08<br>(5.90 – 29.02) | <0.001 |
| Recovered 2 Weeks                                       | 0.88                | 2.41<br>(1.67 – 3.50)   | <0.001 | 0.50                | 1.65<br>(1.02 – 2.66)   | 0.04   |
| 65+                                                     | 0.78                | 2.17<br>(1.70 – 2.78)   | <0.001 | 0.73                | 2.08<br>(1.49 – 2.90)   | <0.001 |
| Wave×Vaccination Coverage<br>2 Weeks                    | -0.73               | 0.48<br>(0.38 – 0.62)   | <0.001 | -0.28               | 0.76<br>(0.66 – 0.87)   | <0.001 |
| <b>Random Effects</b>                                   |                     |                         |        |                     |                         |        |
| $\sigma^2$                                              | 0.74                |                         |        | 1.31                |                         |        |
| T00 zip                                                 | 0.07 <sub>zip</sub> |                         |        | 0.09 <sub>zip</sub> |                         |        |
| ICC                                                     | 0.08                |                         |        | 0.06                |                         |        |
| N <sub>zip</sub>                                        | 52 <sub>zip</sub>   |                         |        | 52 <sub>zip</sub>   |                         |        |
| Observations                                            | 1404                |                         |        | 1352                |                         |        |
| Marginal R <sup>2</sup> /<br>Conditional R <sup>2</sup> | 0.386/<br>0.436     |                         |        | 0.156/<br>0.208     |                         |        |

**eTable 10.** Sensitivity Analysis Using Census Tract-Level Data (Alpha Wave)

As the final sensitivity analysis, we ran Models 1 and 2 using data from the Cook County Medical Examiner's office, which provided more granular spatial data through geocoded addresses of incidence for COVID-19 deaths in Chicago. For infectious diseases, address of incidence is usually the deceased's place of residence. We manually verified that hospitals were not being reported as address of incidence and used these coordinates to find the census tract of each death and summed the number of deaths that occurred across a census tract each week. Because vaccination data is recorded by the CDPH and only available at the ZIP code level, we mapped census tracts onto zip codes such that each observation in the dataset comprised the weekly number of deaths that occurred within the geographic overlap of a census tract and ZIP code ("overlap group"). After excluding the 7 ZIP codes listed in **eTable 2**, there were 1137 of these overlap groups in the dataset.

Out of the deaths recorded by the Medical Examiner from the peak of the second wave on December 13, 2020, to the end of the alpha wave on June 19, 2021, there were 1,409 with geocoded addresses, compared to 1,721 deaths recorded in the CDPH dataset during the same time period.



**eTable 10: Sensitivity analysis using census tract-level data (alpha wave) (continued)**

| Predictors                                           | Unadjusted            |            |        | Adjusted              |            |        |
|------------------------------------------------------|-----------------------|------------|--------|-----------------------|------------|--------|
|                                                      | Estimate              | Std. Error | p      | Estimate              | Std. Error | p      |
| (Intercept)                                          | -10.15                | 0.06       | <0.001 | -11.69                | 0.23       | <0.001 |
| Week                                                 | -0.11                 | 0.01       | <0.001 | -0.11                 | 0.01       | <0.001 |
| Wave                                                 | 2.67                  | 0.28       | <0.001 | 2.46                  | 0.29       | <0.001 |
| Wave×Vaccination Coverage                            | -0.57                 | 0.09       | <0.001 | -0.50                 | 0.09       | <0.001 |
| Recovered                                            |                       |            |        | 0.83                  | 0.14       | <0.001 |
| 65+                                                  |                       |            |        | 0.62                  | 0.11       | <0.001 |
| <b>Random Effects</b>                                |                       |            |        |                       |            |        |
| $\sigma^2$                                           | 3.70                  |            |        | 3.70                  |            |        |
| T <sub>00</sub>                                      | 0.37<br>overlap_group |            |        | 0.35<br>overlap_group |            |        |
| ICC                                                  | 0.10                  |            |        | 0.09                  |            |        |
| N                                                    | 1137<br>overlap_group |            |        | 1137<br>overlap_group |            |        |
| Observations                                         | 30699                 |            |        | 30699                 |            |        |
| Marginal R <sup>2</sup> / Conditional R <sup>2</sup> | 0.081 / 0.169         |            |        | 0.102 / 0.179         |            |        |

**eTable 11.** Sensitivity Analysis Using Census Tract-Level Data (Delta Wave)

We repeated the analysis from Models 1 and 2 on census tract and ZIP code overlap groups for the delta wave, using data from the peak of the alpha wave on May 9, 2021, to the end of the delta wave on November 6, 2021. There were 565 deaths with geocoded addresses from this time period in the Medical Examiner data, compared to 677 deaths recorded in the CDPH dataset.

| Predictors                                           | Unadjusted            |            |        |  | Adjusted              |            |        |
|------------------------------------------------------|-----------------------|------------|--------|--|-----------------------|------------|--------|
|                                                      | Estimate              | Std. Error | p      |  | Estimate              | Std. Error | p      |
| (Intercept)                                          | -11.67                | 0.10       | <0.001 |  | -13.19                | 0.34       | <0.001 |
| Week                                                 | -0.07                 | 0.01       | <0.001 |  | -0.07                 | 0.01       | <0.001 |
| Wave                                                 | 3.76                  | 0.37       | <0.001 |  | 3.30                  | 0.39       | <0.001 |
| Wave×Vaccination Coverage                            | -0.46                 | 0.06       | <0.001 |  | -0.38                 | 0.06       | <0.001 |
| Recovered                                            |                       |            |        |  | 0.54                  | 0.54       | 0.006  |
| 65+                                                  |                       |            |        |  | 0.75                  | 0.15       | <0.001 |
| <b>Random Effects</b>                                |                       |            |        |  |                       |            |        |
| $\sigma^2$                                           | 4.52                  |            |        |  | 4.52                  |            |        |
| T <sub>00</sub>                                      | 0.36<br>overlap_group |            |        |  | 0.36<br>overlap_group |            |        |
| ICC                                                  | 0.07                  |            |        |  | 0.07                  |            |        |
| N                                                    | 1137<br>overlap_group |            |        |  | 1137<br>overlap_group |            |        |
| Observations                                         | 29562                 |            |        |  | 29562                 |            |        |
| Marginal R <sup>2</sup> / Conditional R <sup>2</sup> | 0.038 / 0.109         |            |        |  | 0.058 / 0.124         |            |        |

**eTable 12.** Test for Parallel Trends

To test the parallel trends assumption during the decline in second wave COVID-19 deaths, we fit the following model to the ZIP code-level data from December 13, 2020 to the week of March 28, 2021:

$$(3) \quad \ln(Y_i) - \ln(\text{Population}) = \beta_0 + \beta_1(\text{Week}) + \beta_2(\text{Vaccination\_Group}) + \beta_3(\text{Week} \times \text{Vaccination\_Group})$$

Where *Week* × *Vaccination\_Group* describes the effect of *Vaccination\_Group* on weekly slope during the decline of the second wave, with [*Most vaccinated quartile*] as the reference group.

A likelihood ratio test for *Week* × *Vaccination\_Group*<sub>[Least vaccinated quartile]</sub> = *Week* × *Vaccination\_Group*<sub>[Middle 25–75%]</sub> = 0 with 2 degrees of freedom resulted in a Chi-squared probability of 1.825 with a p-value of 0.4015. Thus, we fail to reject the null hypothesis that there was not a significant association of *Vaccination\_Group* on the weekly slope prior to the alpha wave of COVID-19 deaths.

| Predictors                                              | Estimate | Std. Error | p      |
|---------------------------------------------------------|----------|------------|--------|
| (Intercept)                                             | -10.15   | 0.13       | <0.001 |
| Week                                                    | -0.13    | 0.02       | <0.001 |
| Vaccination_Group<br>[Least vaccinated quartile]        | 0.44     | 0.16       | 0.007  |
| Vaccination_Group<br>[Middle 25-75%]                    | 0.59     | 0.14       | <0.001 |
| Week * Vaccination_Group<br>[Least vaccinated quartile] | 0.02     | 0.02       | 0.412  |
| Week * Vaccination_Group<br>[Middle 25-75%]             | -0.00    | 0.02       | 0.961  |
| Observations                                            | 832      |            |        |
| R <sup>2</sup> Nagelkerke                               | 0.488    |            |        |
